# Supplementary material
Source: PubMed Central journal article supplement (PMC9088818)
Supplement: supp1-3106782.pdf [file supp1-3106782.pdf]

## Supplementary Material

### Calculation of $R_0$ in the model

Mathematical properties: For a non-negative stochastic variable  $a$  that is distributed according to a probability density function  $g(a)$ , the moment generating function is defined as  $M_{g(a)}(z) = \int_{a=0}^{\infty} e^{za} g(a) da$ . When the integral is finite, there is a unique relation between the probability density function and its moment generating function. The moment generating functions have several mathematical properties.

In the paper [1] have exploited the following properties: When the random variable  $a$ , distributed according to  $g(a)$ , can be thought of as the sum of two independent random variables  $a_1$  and  $a_2$ , such that  $a = a_1 + a_2$ , with  $a_1$  and  $a_2$  distributed according to  $f(a_1)$  and  $h(a_2)$ , the moment generating function for the random variable  $a$  can be composed of the moment generating function for  $a_1$  and  $a_2$ :  $M_{g(a)}(z) = M_{f(a)}(z) \times M_{h(a)}(z)$ .

The moment generating function for the generation interval can be composed from moment generating functions for the durations of successive stages in the infection cycle. We introduce two distributions for the successive stages:  $f(a)$  gives the duration from infection to becoming infectious, and  $h(a)$  gives the duration from becoming infectious to infection. The moment generating function for the composite generation interval is then given by:

$$M_{g(a)} = M_{f(a)} \times M_{h(a)}$$

In our model, the incubation period obeys the normal distribution, and the infectious period obeys the exponential distribution.

$$R = \frac{1}{M(z)} = \frac{1}{M_{f(a)}(z)} \cdot \frac{1}{M_{h(a)}(z)}$$

$$\frac{1}{M_{f(a)}(z)} = e^{\mu r - \frac{1}{2}\sigma^2 r^2} \quad [\text{f(a) incubation period obeys the normal distribution}]$$

$$\frac{1}{M_{h(a)}(z)} = \left(1 + \frac{r}{b}\right) \quad [\text{h(a) infectious period obeys the exponential distribution}]$$

$$\text{Therefore, } R = e^{\mu r - \frac{1}{2}\sigma^2 r^2} \cdot \left(1 + \frac{r}{b}\right).$$

## Network Parameter Settings

**Number of nodes per network layer:** The proportion of community workers is derived from the literature [2]. This paper investigated the contact between people in Chinese communities and gives a detailed distribution. We consider nodes with degrees greater than 30 to be community workers. According to the experimental results of this paper, the proportion of community workers is 3.53%.

According to the community data released by the Wuhan Epidemic Prevention and Control Headquarters (<http://www.wuhan.gov.cn>), a large community in Wuhan contains 5.06 small communities on average. So, we divided the nodes into five small communities. Then, to determine the density of small communities, we first counted the population of 616 small communities in Wuhan and then fitted it with a truncated normal distribution ( $\mu = 1943.92$ ,  $\delta = 1193.17$ ) (Fig. S1). In our experiment, the population distribution of small communities conforms to this truncated normal distribution. The size of the small community is as follows: (816, 1110, 1821, 2166, 3739). Household size distributions were taken from the 2019 China National Population Sampling Survey (Fig. S2).

**Connections in the network:** The average community connection is 4.2, according to the contact surveys [2]. The number of connections in the big community was estimated from the literature [3]. The experimental results in [3] show that when the average distance of the community is 50m, the transmission rate is 36 times that of the distance of 500m. Thus, the average number of connections between the individuals in big community is set to 0.12.

## Sensitivity analysis

Sensitivity analysis of the transmission rate parameters  $\theta \cdot \beta$  was performed. We take the case where  $\theta \cdot \beta = 0.30, 0.42, 0.54$ . Fig. S3 shows the size of the epidemic at different transmission rates  $\theta \cdot \beta$  without any intervention. Fig. S4 shows the impact of tracing proportions for asymptomatic cases on the outbreak at different transmission rates ( $\mu_1 = 3$ ,  $T_i = 30$ ). Fig. S5 shows the impact of delayed diagnosis time on asymptomatic cases on the outbreak at different transmission rates ( $\rho = 75\%$ ,  $T_i = 30$ ). Fig S6 shows the impact of implementation time for asymptomatic cases on the outbreak at different transmission rates ( $\mu_1 = 3$ ,  $\rho = 75\%$ ).

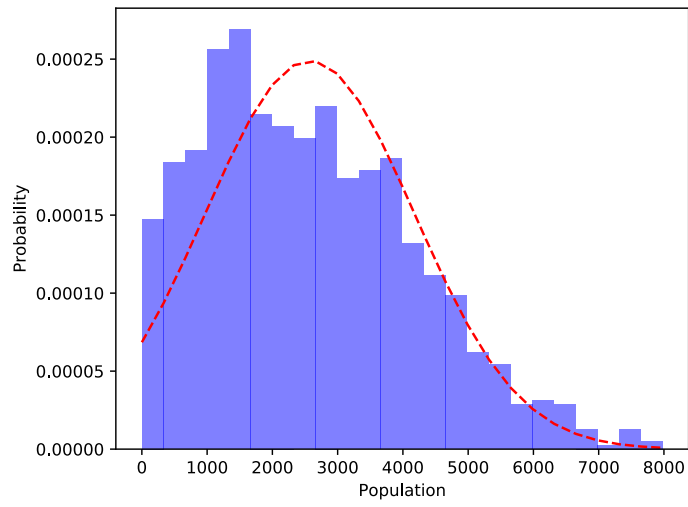

Fig. S1. The distribution of community population size in Wuhan.

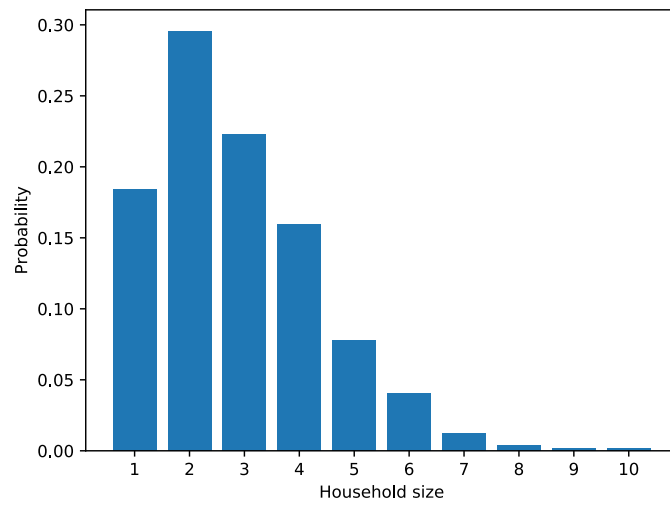

Fig. S2. The distribution of household size in Hubei Province.

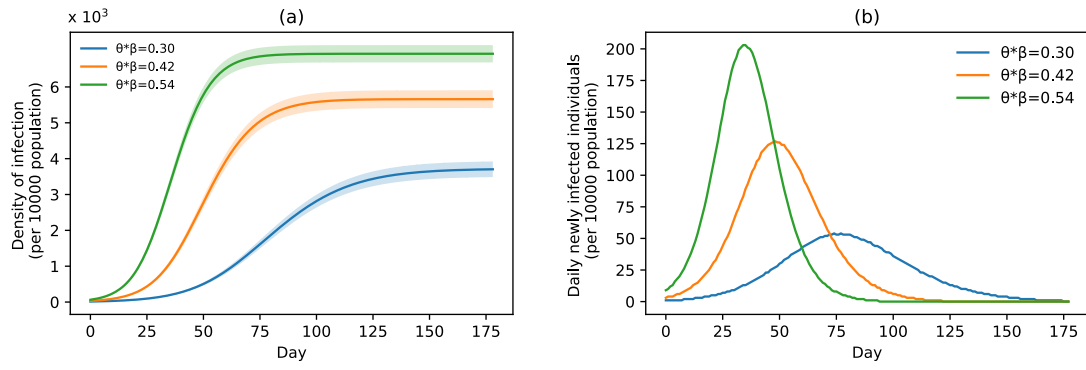

Fig. S3. The impact of transmission rates  $\theta \cdot \beta$  on outbreaks without control measures.

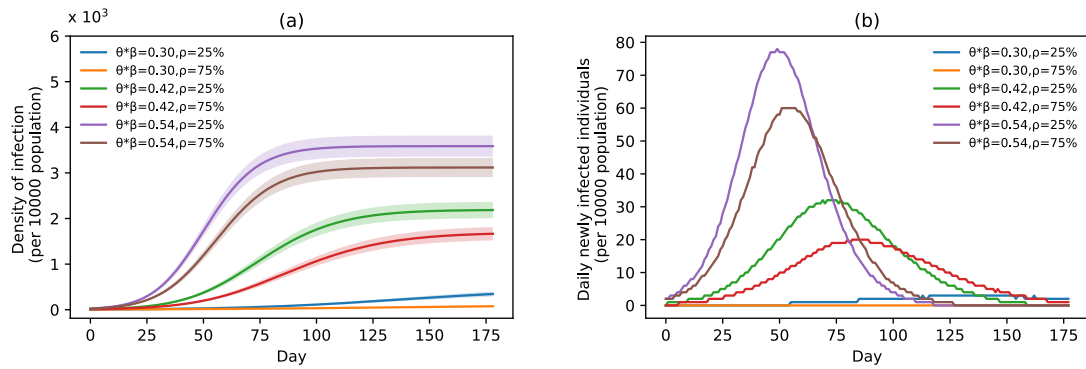

Fig. S4. The impact of tracing proportions for asymptomatic cases on the outbreak at different transmission rates  $\theta \cdot \beta$ .

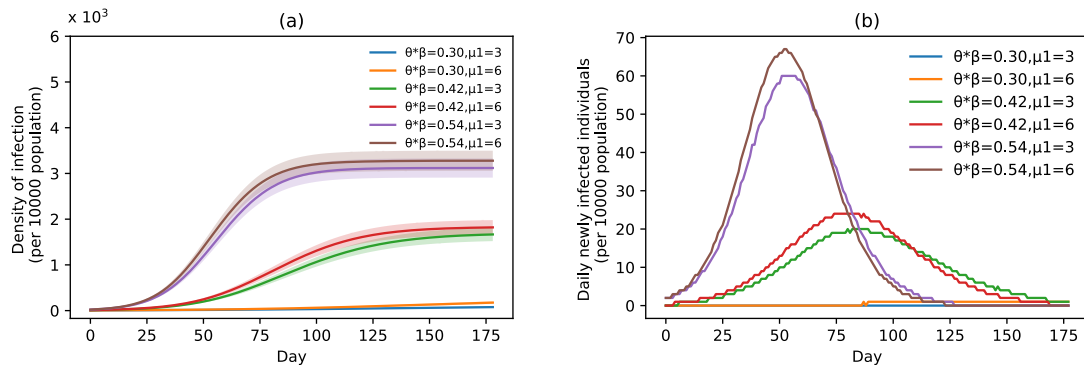

Fig. S5. The impact of delayed diagnosis time on asymptomatic cases on the outbreak at different transmission rates  $\theta \cdot \beta$ .

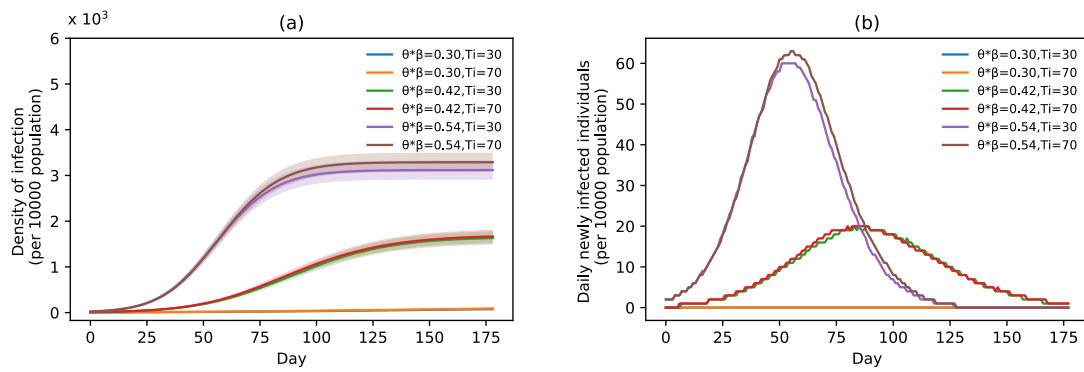

Fig. S6. the impact of implementation time for asymptomatic cases on the outbreak at different transmission rates  $\theta \cdot \beta$ .

**Table 1. Estimated incubation period from selected studies.**

| <b>Author</b>           | <b>Incubation period</b> | <b>Uncertainty</b>  | <b>Source</b>             |
|-------------------------|--------------------------|---------------------|---------------------------|
| Mike[4]                 | 5.40                     | 4.20-6.70 (95% CI)  | NA                        |
| Liu et al. [5]          | 4.80                     | 2.20-7.40           | bioRxiv                   |
| Akhmetzhanov et al. [6] | 5.10                     | 2.00-14.00 (95% CI) | medRxiv                   |
| Sun et al.[7]           | 4.50                     | 3.00–5.50 (IQRs)    | The Lancet Digital Health |
| Read et al.[8]          | 3.00                     | 0.00-6.00           | medRxiv                   |
| Li et al.[9]            | 5.20                     | 4.10-7.00 (95% CI)  | NEJM                      |
| Guan et al.[10]         | 3.00                     | 0.00-24.00          | medRxiv                   |
| Sanche et al.[11]       | 4.20                     | 3.50-5.10 (95% CI)  | medRxiv                   |
| Zhang et al.[12]        | 5.20                     | 1.80-12.40          | medRxiv                   |
| Tindale et al.[13]      | 9.00                     | 7.92-10.20 (95% CI) | medRxiv                   |
| Ping[14]                | 8.06                     | 6.89-9.36 (95% CI)  | medRxiv                   |
| Jing et al.[15]         | 8.13                     | 7.37-8.91 (95% CI)  | medRxiv                   |
| Li et al.[16]           | 3.69                     | 3.28-4.03 (95% CI)  | Science                   |
| Li et al.[16]           | 3.6                      | 3.41-3.91 (95% CI)  | Science                   |
| Li et al.[16]           | 3.44                     | 3.26-4.06 (95% CI)  | Science                   |
| Bi et al.[17]           | 4.80                     | 4.20-5.40 (95% CI)  | medRxiv                   |
| Guan et al.[18]         | 4.00                     | 2.00-7.00 (IQRs)    | NEJM                      |
| Lauer et al.[19]        | 5.20                     | 4.40-6.00 (95% CI)  | medRxiv                   |
| Backer et al.[20]       | 6.40                     | 5.60-7.70 (95% CI)  | EuroSurveill              |

**Table 2 Entire data of 300 pairs from 150 communities.**

| Comm<br>unity<br>ID | Population | Confir<br>med<br>cases | Infection<br>rates<br>(%) | Date      | Confir<br>med<br>cases | Infection<br>rates<br>(%) | Date      | Interval<br>(Days) |
|---------------------|------------|------------------------|---------------------------|-----------|------------------------|---------------------------|-----------|--------------------|
| 1                   | 3891       | 4                      | 0.103                     | 2020/2/9  | 6                      | 0.154                     | 2020/2/15 | 6                  |
| 2                   | 3852       | 3                      | 0.078                     | 2020/2/14 | 6                      | 0.156                     | 2020/2/20 | 6                  |
| 3                   | 3096       | 3                      | 0.097                     | 2020/2/14 | 6                      | 0.194                     | 2020/2/18 | 4                  |
| 4                   | 2634       | 6                      | 0.228                     | 2020/2/14 | 8                      | 0.304                     | 2020/2/18 | 4                  |
| 5                   | 3114       | 8                      | 0.257                     | 2020/2/14 | 9                      | 0.289                     | 2020/2/18 | 4                  |
| 6                   | 6156       | 8                      | 0.130                     | 2020/2/14 | 13                     | 0.211                     | 2020/2/18 | 4                  |
| 7                   | 18483      | 100                    | 0.541                     | 2020/2/15 | 107                    | 0.579                     | 2020/2/17 | 2                  |
| 8                   | 3927       | 3                      | 0.076                     | 2020/2/14 | 6                      | 0.153                     | 2020/2/23 | 9                  |
| 9                   | 8872       | 27                     | 0.304                     | 2020/2/12 | 41                     | 0.462                     | 2020/2/20 | 8                  |
| 10                  | 1797       | 4                      | 0.223                     | 2020/2/14 | 5                      | 0.278                     | 2020/2/17 | 3                  |
| 11                  | 9540       | 11                     | 0.115                     | 2020/2/9  | 22                     | 0.231                     | 2020/2/14 | 5                  |
| 12                  | 7872       | 5                      | 0.064                     | 2020/2/13 | 6                      | 0.076                     | 2020/2/16 | 3                  |
| 13                  | 6606       | 8                      | 0.121                     | 2020/2/9  | 12                     | 0.182                     | 2020/2/22 | 13                 |
| 14                  | 24294      | 6                      | 0.025                     | 2020/2/12 | 7                      | 0.029                     | 2020/2/15 | 3                  |
| 15                  | 12000      | 21                     | 0.175                     | 2020/2/10 | 22                     | 0.183                     | 2020/2/12 | 2                  |
| 16                  | 18000      | 11                     | 0.061                     | 2020/2/9  | 15                     | 0.083                     | 2020/2/12 | 3                  |
| 17                  | 11237      | 7                      | 0.062                     | 2020/2/10 | 13                     | 0.116                     | 2020/2/14 | 4                  |
| 18                  | 6741       | 6                      | 0.089                     | 2020/2/11 | 8                      | 0.119                     | 2020/2/14 | 3                  |
| 19                  | 12915      | 15                     | 0.116                     | 2020/2/11 | 17                     | 0.132                     | 2020/2/18 | 7                  |
| 20                  | 2001       | 2                      | 0.100                     | 2020/2/14 | 5                      | 0.250                     | 2020/2/23 | 9                  |
| 21                  | 2352       | 2                      | 0.085                     | 2020/2/14 | 4                      | 0.170                     | 2020/2/23 | 9                  |
| 22                  | 4518       | 6                      | 0.133                     | 2020/2/10 | 9                      | 0.199                     | 2020/2/14 | 4                  |
| 23                  | 9756       | 10                     | 0.103                     | 2020/2/11 | 13                     | 0.133                     | 2020/2/15 | 4                  |
| 24                  | 8328       | 5                      | 0.060                     | 2020/2/14 | 6                      | 0.072                     | 2020/2/16 | 2                  |
| 25                  | 5949       | 12                     | 0.202                     | 2020/2/13 | 20                     | 0.336                     | 2020/2/21 | 8                  |
| 26                  | 1488       | 3                      | 0.202                     | 2020/2/13 | 6                      | 0.403                     | 2020/2/21 | 8                  |
| 27                  | 19557      | 28                     | 0.143                     | 2020/2/17 | 34                     | 0.174                     | 2020/2/25 | 8                  |
| 28                  | 7083       | 3                      | 0.042                     | 2020/2/12 | 5                      | 0.071                     | 2020/2/14 | 2                  |
| 29                  | 2478       | 2                      | 0.081                     | 2020/2/7  | 4                      | 0.161                     | 2020/2/12 | 5                  |
| 30                  | 8637       | 24                     | 0.278                     | 2020/2/14 | 30                     | 0.347                     | 2020/2/24 | 10                 |
| 31                  | 8679       | 27                     | 0.311                     | 2020/2/10 | 61                     | 0.703                     | 2020/2/16 | 6                  |
| 32                  | 23142      | 49                     | 0.212                     | 2020/2/14 | 54                     | 0.233                     | 2020/2/17 | 3                  |
| 33                  | 4350       | 4                      | 0.092                     | 2020/2/12 | 6                      | 0.138                     | 2020/2/18 | 6                  |
| 34                  | 4280       | 29                     | 0.678                     | 2020/2/14 | 31                     | 0.724                     | 2020/2/15 | 1                  |
| 35                  | 516        | 1                      | 0.194                     | 2020/2/10 | 3                      | 0.581                     | 2020/2/16 | 6                  |
| 36                  | 1746       | 2                      | 0.115                     | 2020/2/17 | 4                      | 0.229                     | 2020/2/23 | 6                  |
| 37                  | 4644       | 11                     | 0.237                     | 2020/2/9  | 20                     | 0.431                     | 2020/2/17 | 8                  |

|    |       |    |       |           |    |       |           |    |
|----|-------|----|-------|-----------|----|-------|-----------|----|
| 38 | 6340  | 24 | 0.379 | 2020/2/13 | 27 | 0.426 | 2020/2/15 | 2  |
| 39 | 7819  | 14 | 0.179 | 2020/2/9  | 39 | 0.499 | 2020/2/14 | 5  |
| 40 | 6246  | 23 | 0.368 | 2020/2/12 | 25 | 0.400 | 2020/2/14 | 2  |
| 41 | 7234  | 15 | 0.207 | 2020/2/12 | 20 | 0.277 | 2020/2/14 | 2  |
| 42 | 7106  | 26 | 0.366 | 2020/2/12 | 30 | 0.422 | 2020/2/14 | 2  |
| 43 | 5570  | 33 | 0.592 | 2020/2/12 | 38 | 0.682 | 2020/2/14 | 2  |
| 44 | 8781  | 25 | 0.285 | 2020/2/12 | 26 | 0.296 | 2020/2/14 | 2  |
| 45 | 5802  | 28 | 0.483 | 2020/2/12 | 34 | 0.586 | 2020/2/14 | 2  |
| 46 | 5541  | 20 | 0.361 | 2020/2/12 | 23 | 0.415 | 2020/2/14 | 2  |
| 47 | 3493  | 4  | 0.115 | 2020/2/13 | 5  | 0.143 | 2020/2/17 | 4  |
| 48 | 1140  | 7  | 0.614 | 2020/2/9  | 11 | 0.965 | 2020/2/13 | 4  |
| 49 | 1770  | 1  | 0.056 | 2020/2/14 | 3  | 0.170 | 2020/2/18 | 4  |
| 50 | 5934  | 1  | 0.017 | 2020/2/4  | 3  | 0.051 | 2020/2/10 | 6  |
| 51 | 2511  | 2  | 0.080 | 2020/2/10 | 4  | 0.159 | 2020/2/16 | 6  |
| 52 | 5058  | 5  | 0.099 | 2020/2/12 | 7  | 0.138 | 2020/2/17 | 5  |
| 53 | 4602  | 2  | 0.043 | 2020/2/13 | 4  | 0.087 | 2020/2/17 | 4  |
| 54 | 6642  | 8  | 0.120 | 2020/2/11 | 10 | 0.151 | 2020/2/12 | 1  |
| 55 | 2142  | 7  | 0.327 | 2020/2/8  | 8  | 0.374 | 2020/2/9  | 1  |
| 56 | 9030  | 23 | 0.255 | 2020/2/15 | 38 | 0.421 | 2020/2/23 | 8  |
| 57 | 12348 | 5  | 0.040 | 2020/2/12 | 7  | 0.057 | 2020/2/15 | 3  |
| 58 | 7004  | 22 | 0.314 | 2020/2/11 | 24 | 0.343 | 2020/2/13 | 2  |
| 59 | 1398  | 22 | 1.574 | 2020/2/17 | 24 | 1.717 | 2020/2/22 | 5  |
| 60 | 11274 | 20 | 0.177 | 2020/2/11 | 22 | 0.195 | 2020/2/14 | 3  |
| 61 | 11674 | 28 | 0.240 | 2020/2/12 | 44 | 0.377 | 2020/2/21 | 9  |
| 62 | 9576  | 17 | 0.178 | 2020/2/14 | 23 | 0.240 | 2020/2/25 | 11 |
| 63 | 3114  | 11 | 0.353 | 2020/2/11 | 17 | 0.546 | 2020/2/22 | 11 |
| 64 | 1950  | 1  | 0.051 | 2020/2/17 | 3  | 0.154 | 2020/2/23 | 6  |
| 65 | 11778 | 4  | 0.034 | 2020/2/12 | 5  | 0.043 | 2020/2/14 | 2  |
| 66 | 8310  | 8  | 0.096 | 2020/2/10 | 14 | 0.169 | 2020/2/14 | 4  |
| 67 | 7608  | 13 | 0.171 | 2020/2/9  | 28 | 0.368 | 2020/2/15 | 6  |
| 68 | 12537 | 26 | 0.207 | 2020/2/13 | 28 | 0.223 | 2020/2/24 | 11 |
| 69 | 1914  | 3  | 0.157 | 2020/2/9  | 4  | 0.209 | 2020/2/13 | 4  |
| 70 | 6987  | 11 | 0.157 | 2020/2/9  | 13 | 0.186 | 2020/2/13 | 4  |
| 71 | 4434  | 1  | 0.023 | 2020/2/9  | 2  | 0.045 | 2020/2/13 | 4  |
| 72 | 14724 | 10 | 0.068 | 2020/2/13 | 14 | 0.095 | 2020/2/16 | 3  |
| 73 | 1392  | 11 | 0.790 | 2020/2/10 | 17 | 1.221 | 2020/2/14 | 4  |
| 74 | 1764  | 13 | 0.737 | 2020/2/14 | 19 | 1.077 | 2020/2/19 | 5  |
| 75 | 4728  | 19 | 0.402 | 2020/2/11 | 22 | 0.465 | 2020/2/22 | 11 |
| 76 | 9279  | 28 | 0.302 | 2020/2/12 | 32 | 0.345 | 2020/2/14 | 2  |
| 77 | 3765  | 1  | 0.027 | 2020/2/10 | 2  | 0.053 | 2020/2/11 | 1  |
| 78 | 1440  | 14 | 0.972 | 2020/2/14 | 31 | 2.153 | 2020/2/21 | 7  |
| 79 | 8208  | 17 | 0.207 | 2020/2/12 | 19 | 0.232 | 2020/2/16 | 4  |
| 80 | 13094 | 8  | 0.061 | 2020/2/8  | 14 | 0.107 | 2020/2/15 | 7  |



|     |       |    |       |           |    |       |           |    |
|-----|-------|----|-------|-----------|----|-------|-----------|----|
| 81  | 6282  | 2  | 0.032 | 2020/2/15 | 5  | 0.080 | 2020/2/24 | 9  |
| 82  | 7350  | 18 | 0.245 | 2020/2/13 | 31 | 0.422 | 2020/2/15 | 2  |
| 83  | 3246  | 25 | 0.770 | 2020/2/15 | 28 | 0.863 | 2020/2/17 | 2  |
| 84  | 8970  | 10 | 0.111 | 2020/2/14 | 11 | 0.123 | 2020/2/16 | 2  |
| 85  | 5738  | 12 | 0.209 | 2020/2/9  | 19 | 0.331 | 2020/2/12 | 3  |
| 86  | 7115  | 6  | 0.084 | 2020/2/15 | 15 | 0.211 | 2020/2/17 | 2  |
| 87  | 8642  | 11 | 0.127 | 2020/2/10 | 13 | 0.150 | 2020/2/13 | 3  |
| 88  | 5512  | 24 | 0.435 | 2020/2/12 | 34 | 0.617 | 2020/2/20 | 8  |
| 89  | 6261  | 8  | 0.128 | 2020/2/9  | 17 | 0.272 | 2020/2/12 | 3  |
| 90  | 16000 | 24 | 0.150 | 2020/2/12 | 36 | 0.225 | 2020/2/17 | 5  |
| 91  | 5310  | 14 | 0.264 | 2020/2/14 | 19 | 0.358 | 2020/2/21 | 7  |
| 92  | 1980  | 7  | 0.354 | 2020/2/11 | 8  | 0.404 | 2020/2/14 | 3  |
| 93  | 3042  | 14 | 0.460 | 2020/2/16 | 16 | 0.526 | 2020/2/19 | 3  |
| 94  | 3252  | 1  | 0.031 | 2020/2/16 | 3  | 0.092 | 2020/2/20 | 4  |
| 95  | 1782  | 1  | 0.056 | 2020/2/12 | 3  | 0.168 | 2020/2/16 | 4  |
| 96  | 6664  | 3  | 0.045 | 2020/2/15 | 5  | 0.075 | 2020/2/20 | 5  |
| 97  | 8372  | 32 | 0.382 | 2020/2/14 | 34 | 0.406 | 2020/2/17 | 3  |
| 98  | 10347 | 5  | 0.048 | 2020/2/15 | 6  | 0.058 | 2020/2/18 | 3  |
| 99  | 9300  | 27 | 0.290 | 2020/2/8  | 33 | 0.355 | 2020/2/14 | 6  |
| 100 | 4110  | 7  | 0.170 | 2020/2/11 | 9  | 0.219 | 2020/2/14 | 3  |
| 101 | 9930  | 26 | 0.262 | 2020/2/15 | 28 | 0.282 | 2020/2/17 | 2  |
| 102 | 5736  | 9  | 0.157 | 2020/2/14 | 11 | 0.192 | 2020/2/23 | 9  |
| 103 | 16336 | 49 | 0.300 | 2020/2/14 | 51 | 0.312 | 2020/2/17 | 3  |
| 104 | 3978  | 6  | 0.151 | 2020/2/10 | 7  | 0.176 | 2020/2/14 | 4  |
| 105 | 16203 | 10 | 0.062 | 2020/2/13 | 10 | 0.062 | 2020/2/16 | 3  |
| 106 | 1446  | 2  | 0.138 | 2020/2/10 | 3  | 0.208 | 2020/2/16 | 6  |
| 107 | 7392  | 10 | 0.135 | 2020/2/11 | 12 | 0.162 | 2020/2/13 | 2  |
| 108 | 10224 | 4  | 0.039 | 2020/2/13 | 6  | 0.059 | 2020/2/17 | 4  |
| 109 | 11394 | 8  | 0.070 | 2020/2/9  | 11 | 0.097 | 2020/2/19 | 10 |
| 110 | 1380  | 5  | 0.362 | 2020/2/14 | 13 | 0.942 | 2020/2/21 | 7  |
| 111 | 9315  | 8  | 0.086 | 2020/2/9  | 13 | 0.140 | 2020/2/19 | 10 |
| 112 | 10287 | 12 | 0.117 | 2020/2/10 | 15 | 0.146 | 2020/2/13 | 3  |
| 113 | 5502  | 21 | 0.382 | 2020/2/10 | 26 | 0.473 | 2020/2/13 | 3  |
| 114 | 4374  | 6  | 0.137 | 2020/2/9  | 8  | 0.183 | 2020/2/13 | 4  |
| 115 | 1341  | 2  | 0.149 | 2020/2/12 | 4  | 0.298 | 2020/2/16 | 4  |
| 116 | 1950  | 6  | 0.308 | 2020/2/10 | 10 | 0.513 | 2020/2/14 | 4  |
| 117 | 3840  | 1  | 0.026 | 2020/2/15 | 4  | 0.104 | 2020/2/16 | 1  |
| 118 | 4947  | 7  | 0.141 | 2020/2/12 | 8  | 0.162 | 2020/2/13 | 1  |
| 119 | 3960  | 3  | 0.076 | 2020/2/12 | 5  | 0.126 | 2020/2/21 | 9  |
| 120 | 7122  | 2  | 0.028 | 2020/2/13 | 5  | 0.070 | 2020/2/15 | 2  |
| 121 | 10374 | 14 | 0.135 | 2020/2/10 | 35 | 0.337 | 2020/2/19 | 9  |
| 122 | 3342  | 2  | 0.060 | 2020/2/14 | 3  | 0.090 | 2020/2/21 | 7  |
| 123 | 9120  | 2  | 0.022 | 2020/2/9  | 10 | 0.110 | 2020/2/22 | 13 |

|     |       |    |       |           |    |       |           |    |
|-----|-------|----|-------|-----------|----|-------|-----------|----|
| 124 | 3288  | 2  | 0.061 | 2020/2/14 | 4  | 0.122 | 2020/2/21 | 7  |
| 125 | 7434  | 16 | 0.215 | 2020/2/12 | 20 | 0.269 | 2020/2/24 | 12 |
| 126 | 9404  | 2  | 0.021 | 2020/2/10 | 3  | 0.032 | 2020/2/15 | 5  |
| 127 | 7575  | 19 | 0.251 | 2020/2/12 | 23 | 0.304 | 2020/2/14 | 2  |
| 128 | 5652  | 5  | 0.088 | 2020/2/10 | 7  | 0.124 | 2020/2/14 | 4  |
| 129 | 2622  | 4  | 0.153 | 2020/2/10 | 6  | 0.229 | 2020/2/14 | 4  |
| 130 | 2610  | 2  | 0.077 | 2020/2/10 | 3  | 0.115 | 2020/2/14 | 4  |
| 131 | 7484  | 14 | 0.187 | 2020/2/10 | 16 | 0.214 | 2020/2/13 | 3  |
| 132 | 2682  | 3  | 0.112 | 2020/2/16 | 9  | 0.336 | 2020/2/24 | 8  |
| 133 | 8896  | 25 | 0.281 | 2020/2/14 | 36 | 0.405 | 2020/2/19 | 5  |
| 134 | 2488  | 19 | 0.764 | 2020/2/10 | 39 | 1.568 | 2020/2/19 | 9  |
| 135 | 5399  | 11 | 0.204 | 2020/2/13 | 15 | 0.278 | 2020/2/18 | 5  |
| 136 | 1785  | 6  | 0.336 | 2020/2/15 | 9  | 0.504 | 2020/2/16 | 1  |
| 137 | 9514  | 13 | 0.137 | 2020/2/14 | 15 | 0.158 | 2020/2/17 | 3  |
| 138 | 9038  | 10 | 0.111 | 2020/2/13 | 14 | 0.155 | 2020/2/16 | 3  |
| 139 | 6552  | 5  | 0.076 | 2020/2/14 | 7  | 0.107 | 2020/2/20 | 6  |
| 140 | 3918  | 5  | 0.128 | 2020/2/9  | 7  | 0.179 | 2020/2/13 | 4  |
| 141 | 3323  | 27 | 0.813 | 2020/2/3  | 55 | 1.655 | 2020/2/8  | 5  |
| 142 | 13050 | 27 | 0.207 | 2020/2/3  | 55 | 0.422 | 2020/2/8  | 5  |
| 143 | 11210 | 22 | 0.196 | 2020/2/3  | 32 | 0.286 | 2020/2/8  | 5  |
| 144 | 6844  | 21 | 0.307 | 2020/2/3  | 32 | 0.468 | 2020/2/8  | 5  |
| 145 | 16336 | 17 | 0.104 | 2020/2/3  | 34 | 0.208 | 2020/2/8  | 5  |
| 146 | 9745  | 15 | 0.154 | 2020/2/3  | 31 | 0.318 | 2020/2/8  | 5  |
| 147 | 10849 | 14 | 0.129 | 2020/2/3  | 29 | 0.267 | 2020/2/8  | 5  |
| 148 | 7921  | 14 | 0.177 | 2020/2/3  | 30 | 0.379 | 2020/2/8  | 5  |
| 149 | 10812 | 14 | 0.129 | 2020/2/3  | 37 | 0.342 | 2020/2/8  | 5  |
| 150 | 4559  | 12 | 0.263 | 2020/2/3  | 41 | 0.899 | 2020/2/8  | 5  |

## References

- [1] J. Wallinga and M. Lipsitch, "How generation intervals shape the relationship between growth rates and reproductive numbers," *Proceedings of the Royal Society B: Biological Sciences*, vol. 274, no. 1609, pp. 599-604, 2007.
- [2] K. Sun *et al.*, "Transmission heterogeneities, kinetics, and controllability of SARS-CoV-2," *Science*, vol. 371, no. 6526, 2021.
- [3] H. Salje *et al.*, "How social structures, space, and behaviors shape the spread of infectious diseases using chikungunya as a case study," *Proceedings of the National Academy of Sciences*, vol. 113, no. 47, pp. 13420-13425, 2016.
- [4] F. Mike, "nCoV: incubation period distribution," 2020.
- [5] T. Liu *et al.*, "Transmission dynamics of 2019 novel coronavirus (2019-nCoV)," 2020.
- [6] A. R. Akhmetzhanov, K. Mizumoto, S.-m. Jung, N. M. Linton, R. Omori, and H. Nishiura, "Epidemiological characteristics of novel coronavirus infection: A statistical analysis of publicly available case data," *medRxiv*, 2020.
- [7] K. Sun, J. Chen, and C. Viboud, "Early epidemiological analysis of the coronavirus disease 2019 outbreak based on crowdsourced data: a population-level observational study," *The Lancet Digital Health*, vol. 2, no. 4, pp. e201-e208, 2020.
- [8] J. M. Read, J. R. Bridgen, D. A. Cummings, A. Ho, and C. P. Jewell, "Novel coronavirus 2019-nCoV: early estimation of epidemiological parameters and epidemic predictions," *medRxiv*, p. 2020.01.23.20018549, 2020.
- [9] D. S. Hui *et al.*, "The continuing 2019-nCoV epidemic threat of novel coronaviruses to global health - The latest 2019 novel coronavirus outbreak in Wuhan, China," *Int J Infect Dis*, vol. 91, pp. 264-266, 2020-01-14 2020.
- [10] W.-j. Guan *et al.*, "Clinical characteristics of 2019 novel coronavirus infection in China," *medRxiv*, p. 2020.02.06.20020974, 2020.
- [11] S. Sanche, Y. T. Lin, C. Xu, E. Romero-Severson, N. Hengartner, and R. Ke, "The Novel Coronavirus, 2019-nCoV, is Highly Contagious and More Infectious Than Initially Estimated," *medRxiv*, p. 2020.02.07.20021154, 2020.
- [12] J. Zhang *et al.*, "Evolving epidemiology of novel coronavirus diseases 2019 and possible interruption of local transmission outside Hubei Province in China: a descriptive and modeling study," *medRxiv*, p. 2020.02.21.20026328, 2020.
- [13] L. Tindale *et al.*, "Transmission interval estimates suggest pre-symptomatic spread of COVID-19," *medRxiv*, p. 2020.03.03.20029983, 2020.
- [14] K. Ping, "Epidemiologic Characteristics of COVID-19 in Guizhou, China," *medRxiv*, p. 2020.03.01.20028944, 2020.
- [15] Q. Jing, C. You, Q. Lin, T. Hu, S. Yu, and X.-H. Zhou, "Estimation of incubation period distribution of COVID-19 using disease onset forward time: a novel cross-sectional and forward follow-up study," *medRxiv*, p. 2020.03.06.20032417, 2020.
- [16] R. Li *et al.*, "Substantial undocumented infection facilitates the rapid dissemination of novel coronavirus (COVID-19)," *medRxiv*, p. 2020.02.14.20023127, 2020.
- [17] Q. Bi *et al.*, "Epidemiology and Transmission of COVID-19 in Shenzhen China: Analysis of 391 cases and 1,286 of their close contacts," *medRxiv*, p. 2020.03.03.20028423, 2020.

- [18] W. Guan *et al.*, "Clinical Characteristics of Coronavirus Disease 2019 in China," *The New England Journal of Medicine*, 2020.
- [19] S. A. Lauer *et al.*, "The incubation period of 2019-nCoV from publicly reported confirmed cases: estimation and application," *medRxiv*, p. 2020.02.02.20020016, 2020.
- [20] J. A. Backer, D. Klinkenberg, and J. Wallinga, "Incubation period of 2019 novel coronavirus (2019-nCoV) infections among travellers from Wuhan, China, 20–28 January 2020," *Eurosurveillance*, vol. 25, no. 5, p. 2000062, 2020.
